# Supplementary material for: Long-Term Longitudinal Analysis of Neutralizing Antibody Response to Three Vaccine Doses in a Real-Life Setting of Previously SARS-CoV-2 Infected Healthcare Workers: A Model for Predicting Response to Further Vaccine Doses
Source: MDPI journal article supplement (doi:10.3390/vaccines10081237), 2022-08-02
Supplement: s1 [file s1]

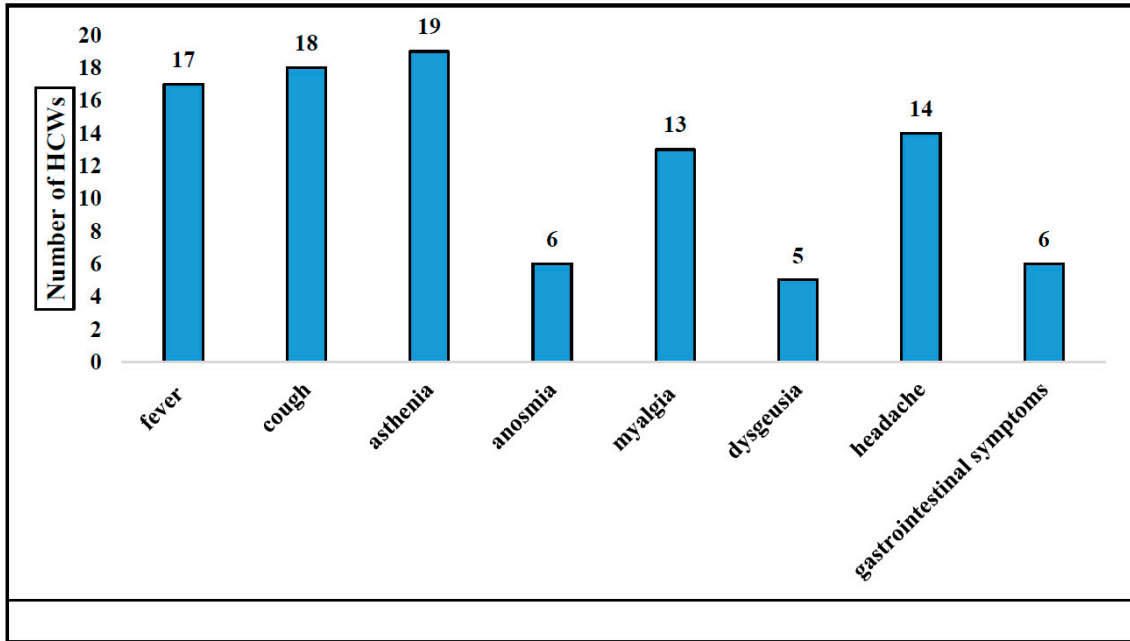

**Figure S1.** Signs and/or symptoms of the 19 healthcare workers (HCWs) with mild COVID-19 disease. Data are expressed as absolute number of HCWs reporting the sign or symptom..

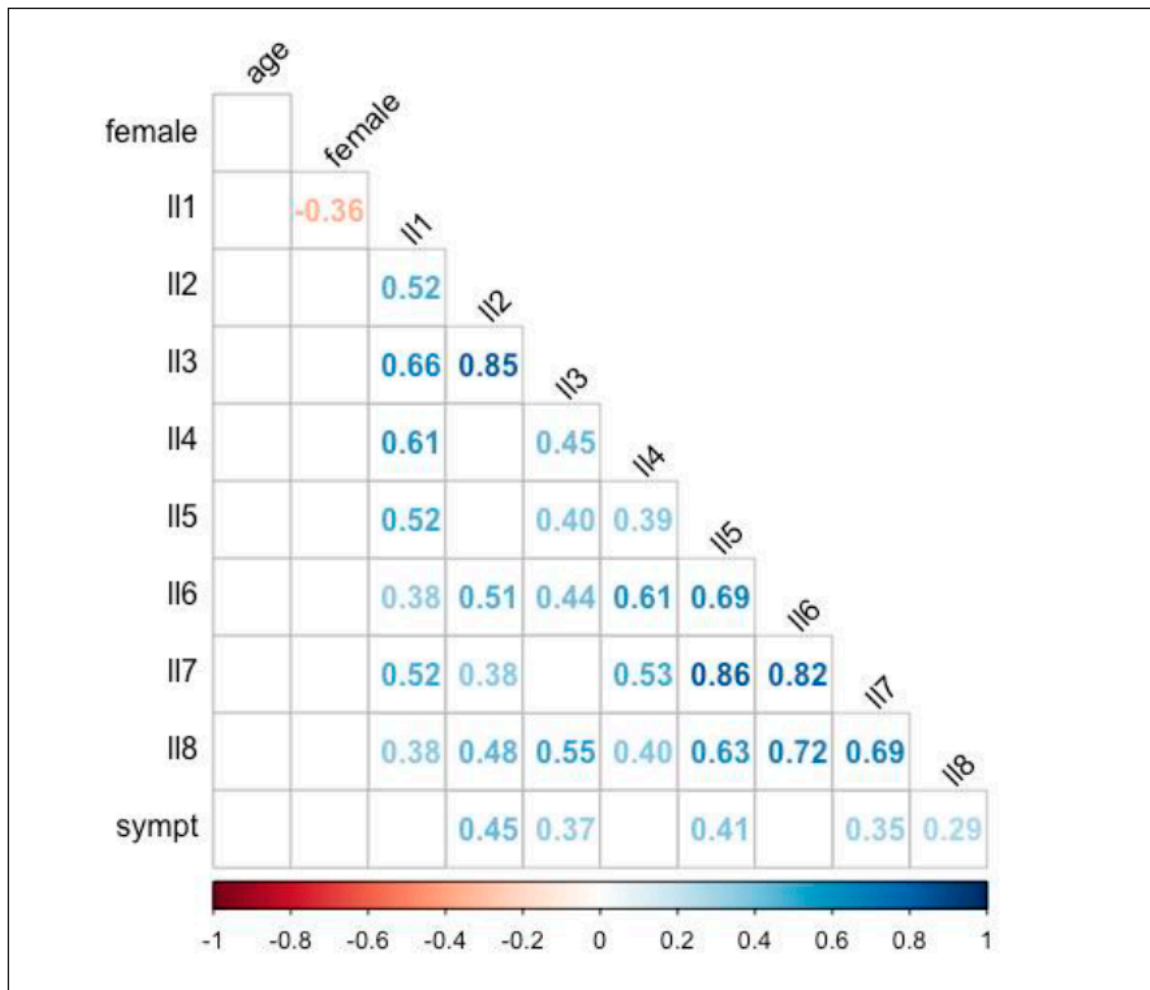

**Figure S2.** Pairwise correlations between NtAb titers (expressed as ID<sub>50</sub>) at the eight study points, age, gender (expressed as being of female gender) and having a symptomatic disease. Rank method of Spearman was applied. Only significant Rho coefficients are reported. Blue: positive correlations, red: negative correlations. NtAb: neutralizing antibodies; II: Time; ID<sub>50</sub>: reciprocal value of the sample dilution that showed a 50% protection of virus cyto-pathic effect.
